# Supplementary material
Source: Springer Nature journal article supplement (https://www.springermedizin.de/resource/supplementary/13014_2013_960_MOESM2_ESM.pdf/9634526)

(a)

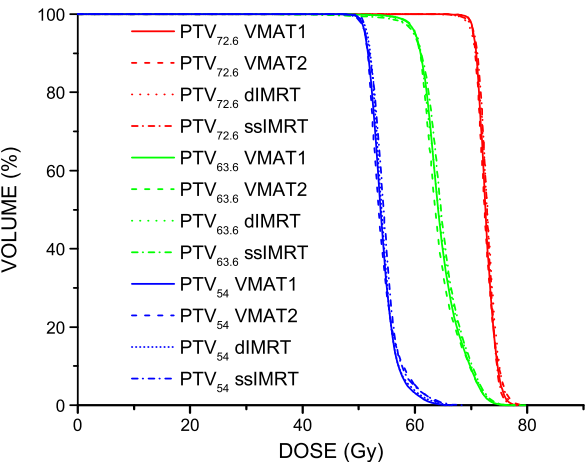

(b)

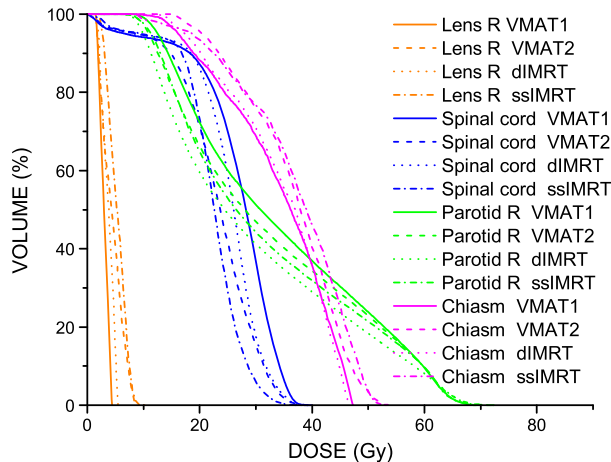

(c)

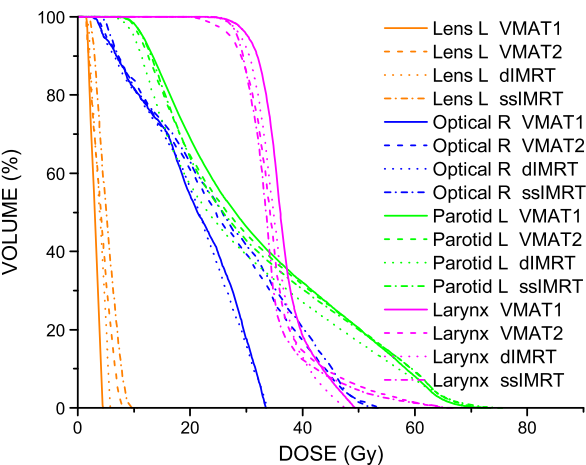

(d)

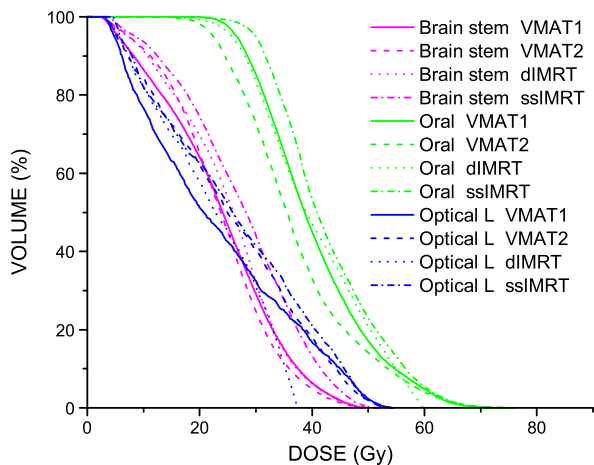

Supplement: MOESM2 [file 9634526]
